# Supplementary material
Source: PubMed Central journal article supplement (PMC3564467)
Supplement: Supp_Fig2.pdf [file Supp_Fig2.pdf]

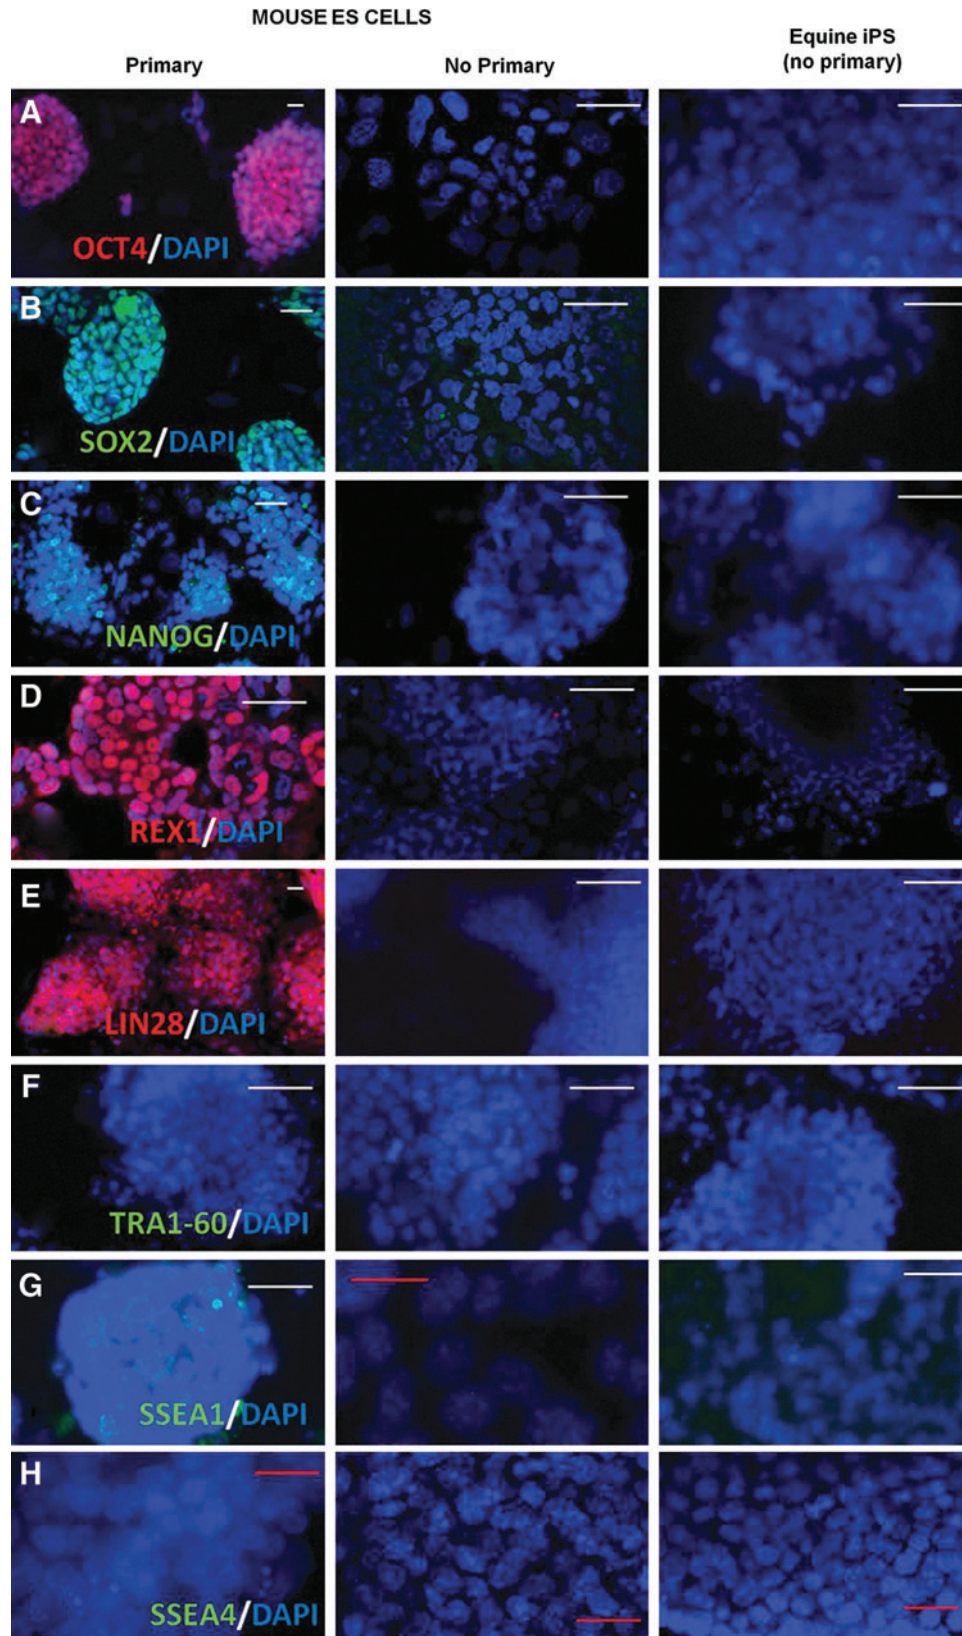

**SUPPLEMENTARY FIG. S2.** Immunostaining controls for pluripotency markers. Immunostaining of mouse ESCs (*left column*) for (A) OCT4, (B) SOX2, (C) NANOG, (D) REX1, (E) LIN28, (F) TRA1-60, (G) SSEA1, and (H) SSEA4 showing positive signal for all markers, except TRA1-60 and SSEA4. Mouse ESCs (*middle column*) and equine iPSCs (*right column*) that were processed in the absence of primary antibody (*left column*) are also shown. White scale bar=50  $\mu$ m; red scale bar=100  $\mu$ m. iPSCs, induced pluripotent stem cells.
