# Supplementary material
Source: PubMed Central journal article supplement (PMC3564467)
Supplement: Supp_Fig3.pdf [file Supp_Fig3.pdf]

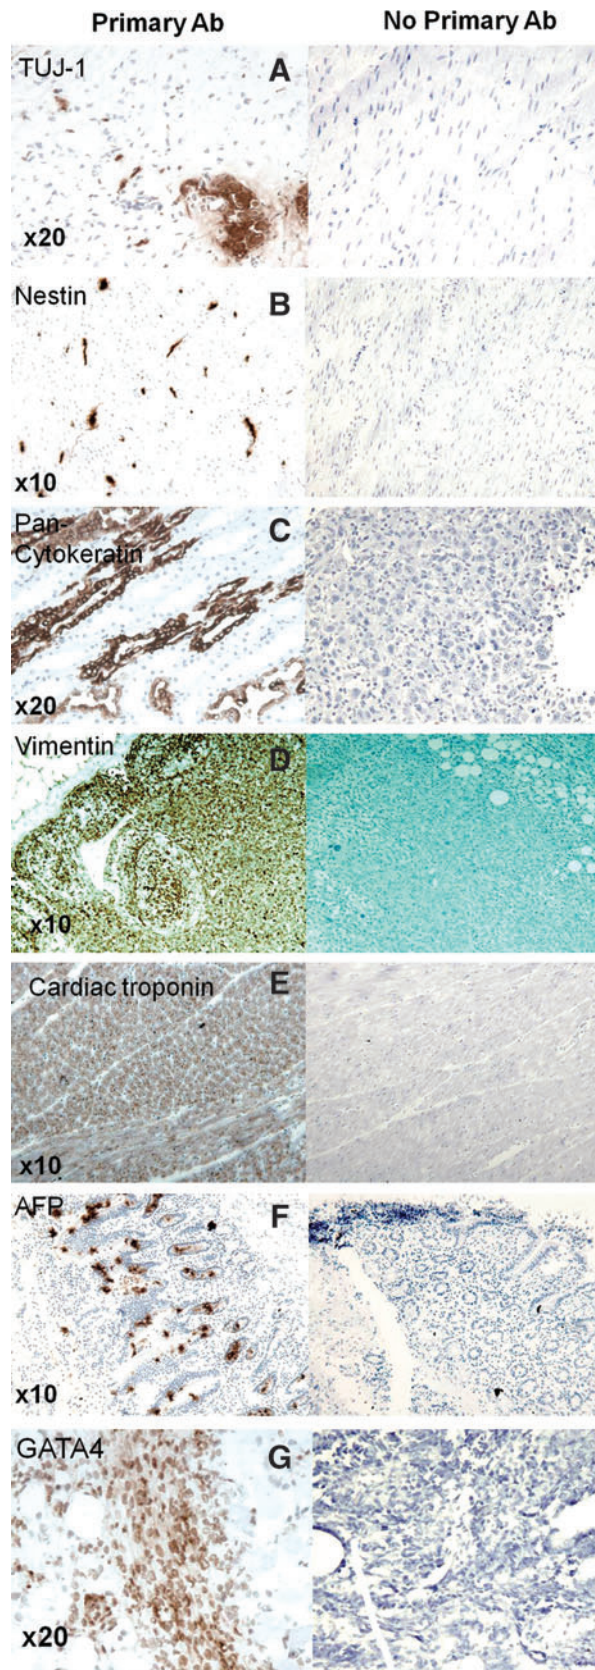

**SUPPLEMENTARY FIG. S3.** Immunostaining controls for differentiation markers. Immunohistochemistry of equine tissues for (A) TUJ-1, (B) Nestin, (C) Pan-cytokeratin, (D) vimentin, (E) troponin I, (F) alpha-fetoprotein, and (G) GATA4. Horseradish peroxidase-labeled secondary antibodies were used. Staining was done on the adult equine brain (A, B), heart (D, E, G), skin (C), and liver (F).
